# Supplementary material for: Biosurfactant Production by Bacillus amyloliquefaciens C11 and Streptomyces lavendulae C27 Isolated from a Biopurification System for Environmental Applications
Source: MDPI journal article supplement (doi:10.3390/microorganisms10101892), 2022-09-23
Supplement: s1 [file s1]

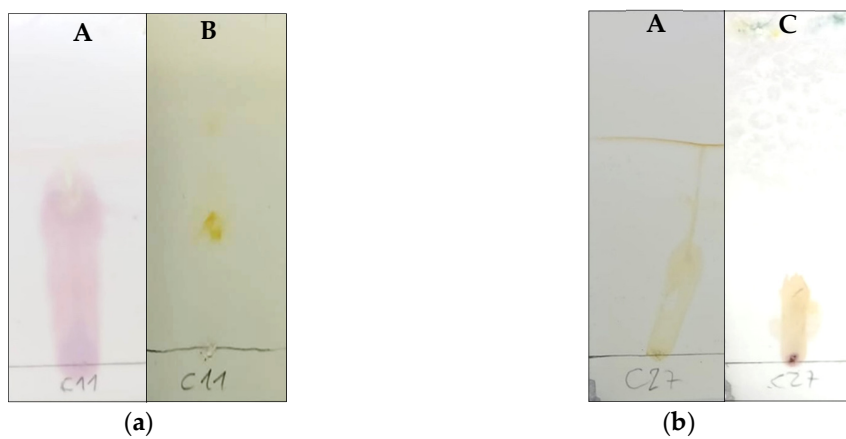

**Figure S1.** TLC plates of purified biosurfactants of *Bacillus amyloliquefaciens* (a) and *Streptomyces lavendulae* (b) strains. Reaction with ninhydrin in (A), iodine in (B) and  $\text{H}_2\text{SO}_4$  in (C).
